# Supplementary material for: Alkaline stable imidazolium-based ionomers containing poly(arylene ether sulfone) side chains for alkaline anion exchange membranes
Source: Royal Society of Chemistry journal article supplement (doi:10.1039/c3ta15178f), 2014-01-01
Supplement: c3ta15178f.pdf [file c3ta15178f.pdf]

## Electronic Supplementary Information

### Alkaline Stable Imidazolium-based Ionomers Containing Poly(arylene ether sulfone) Side Chains for Alkaline Anion Exchange Membranes

Zhihong Si, Zhe Sun, Fenglou Gu, Lihua Qiu, and Feng Yan\*

Jiangsu Key Laboratory of Advanced Functional Polymer Design and Application, Department  
of Polymer Science and Engineering, College of Chemistry, Chemical Engineering and  
Materials Science, Soochow University, Suzhou, 215123, China

E-mail: [fyan@suda.edu.cn](mailto:fyan@suda.edu.cn)

#### 1. GPC characterization

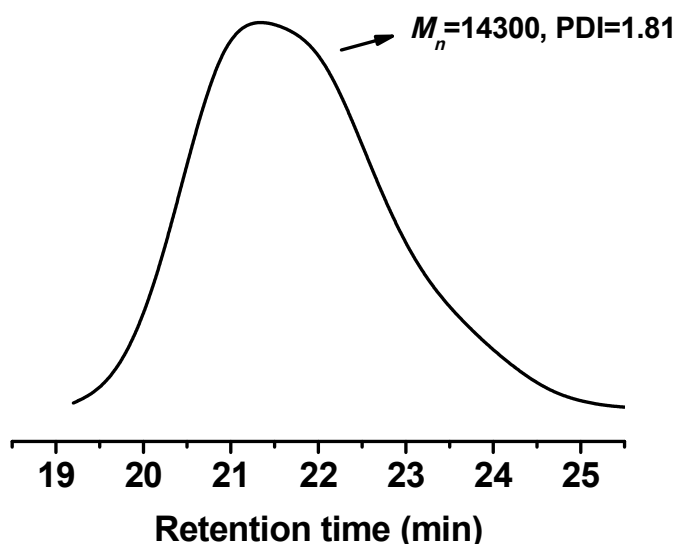

**Fig. S1** GPC traces of the of poly (arylene ether sulfone)-g-poly(4-vinylbenzyl chloride), DMF was used as the eluent at a flow rate of 1.0 ml min<sup>-1</sup> at 30 °C.

## 2. SEM characterization

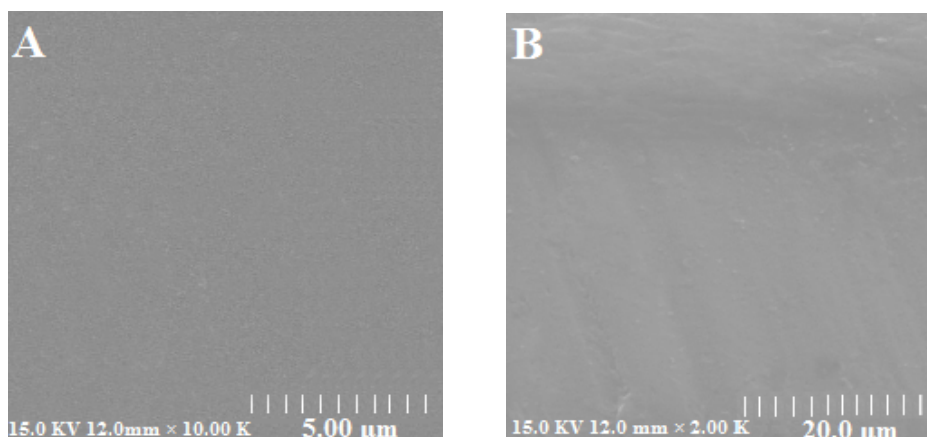

**Fig. S2** SEM images of produced [PUVBIm][OH] membrane in OH<sup>-</sup> form: (A) surface view, (B) cross-sectional view.

## 3. DSC characterization

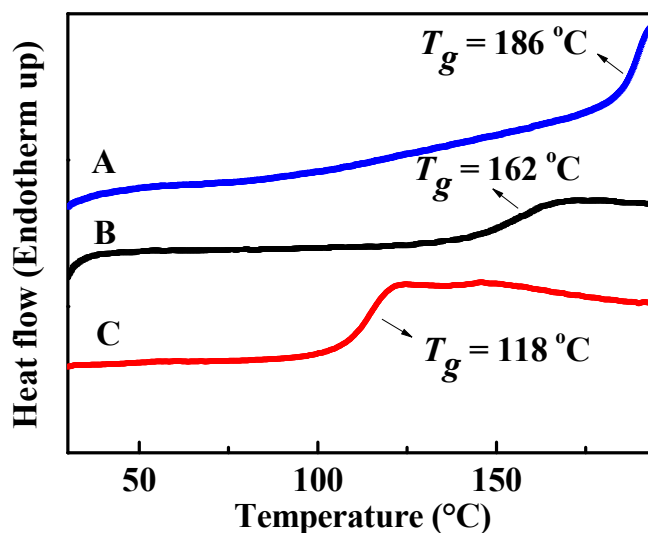

**Fig. S3** DSC curves of (A) poly(arylene ether sulfone), (B) poly(arylene ether sulfone)-g-poly(4-vinylbenzyl chloride), and (C) poly(4-vinylbenzyl chloride) membranes.
